# Supplementary material for: Characterization of an Immortalized Human Microglial Cell Line as a Tool for the Study of Diabetic Retinopathy
Source: MDPI journal article supplement (doi:10.3390/ijms23105745), 2022-05-20

# Characterization of an immortalized human microglial cell line as a tool for the study of diabetic retinopathy

*Aurora Mazzeo, Massimo Porta, Elena Beltramo*

## Supplementary Material

**Table S1.** Factors and combinations tested to determine the best mixture to induce M1 activation in microglial cells. All factors are of human origin, concentrations and exposure times were chosen according to the literature. Nitric oxide (NO) release was measured in the supernatants through Griess reaction, inducible nitric oxide synthase (iNOS), interferon- $\gamma$  (IFN- $\gamma$ ), MHC I (pro-inflammatory markers), and transforming growth factor- $\beta$  (TGF- $\beta$ , anti-inflammatory) by Western blotting in cell lysates. We chose the combination that exerted the maximum effects with the lowest concentrations: 10 ng/mL tumor necrosis factor - $\alpha$  (TNF- $\alpha$ ) + 20 ng/mL interleukin 1 $\beta$  (IL-1 $\beta$ ) + 50 ng/mL IFN- $\gamma$ . Lypopolisaccharide (LPS) had no effect on IM-HM cells. Legend: no = non-detectable, ns = no difference vs ctrl (unexposed cells),  $\uparrow$  = low increase vs ctrl (<25%),  $\uparrow\uparrow$  = medium increase vs ctrl (25-50%),  $\uparrow\uparrow\uparrow$  = high increase vs ctrl (50-75%),  $\downarrow$  = decrease (<25%) vs ctrl, - = not tested.

| Factors                                                                    | Concentrations<br>(ng/mL) | Time<br>(h) | NO<br>release | iNOS | IFN $\gamma$       | MHC II                     | TGF $\beta$  |
|----------------------------------------------------------------------------|---------------------------|-------------|---------------|------|--------------------|----------------------------|--------------|
| <b>LPS</b>                                                                 | 100/200/500/1000          | 24/48/96    | no            | ns   | ns                 | -                          | ns           |
| <b>TNF<math>\alpha</math></b>                                              | 10/20                     | 24/48/96    | no            | ns   | ns                 | $\uparrow\uparrow$         | ns           |
| <b>IL6</b>                                                                 | 10/20                     | 24/48/96    | no            | ns   | ns                 | ns                         | ns           |
| <b>IL1<math>\beta</math></b>                                               | 20/40                     | 24/48/96    | no            | ns   | $\uparrow$         | $\uparrow\uparrow$         | $\downarrow$ |
| <b>IFN<math>\gamma</math></b>                                              | 20/50                     | 24/48/96    | no            | ns   | ns                 | $\uparrow$                 | $\downarrow$ |
| <b>IL1<math>\beta</math>+IL6</b>                                           | 20+20 / 40+20             | 24          | no            | ns   | $\uparrow$         | -                          | ns           |
| <b>TNF<math>\alpha</math>+IL1<math>\beta</math></b>                        | 10+20 / 10+40             | 24          | no            | ns   | $\uparrow$         | $\uparrow\uparrow$         | ns           |
| <b>TNF<math>\alpha</math>+IL6</b>                                          | 10+20                     | 24          | no            | ns   | $\uparrow$         | -                          | ns           |
| <b>TNF<math>\alpha</math>+IL1<math>\beta</math>+IL6</b>                    | 10+20+20 / 10+40+20       | 24          | no            | ns   | $\uparrow$         | -                          | $\downarrow$ |
| <b>TNF<math>\alpha</math>+IL1<math>\beta</math>+IL6+LPS</b>                | 10+20+20+500              | 24          | no            | ns   | $\uparrow$         | -                          | $\downarrow$ |
| <b>IL1<math>\beta</math>+IFN<math>\gamma</math></b>                        | 20+20 / 20+50             | 24          | no            | ns   | $\uparrow$         | $\uparrow\uparrow$         | $\downarrow$ |
| <b>TNF<math>\alpha</math>+IFN<math>\gamma</math></b>                       | 10+50                     | 24          | no            | ns   | $\uparrow$         | $\uparrow\uparrow$         | ns           |
| <b>TNF<math>\alpha</math>+IL1<math>\beta</math>+IFN<math>\gamma</math></b> | 10+40+50                  | 24          | no            | ns   | $\uparrow\uparrow$ | $\uparrow\uparrow\uparrow$ | $\downarrow$ |
| <b>TNF<math>\alpha</math>+IL1<math>\beta</math>+IFN<math>\gamma</math></b> | <b>10+20+50</b>           | 24          | no            | ns   | $\uparrow\uparrow$ | $\uparrow\uparrow\uparrow$ | $\downarrow$ |

**Table S2.** List of primers/antibodies used and relative working dilutions. Primers were all purchased from Eurofins Genomics.

| <i>Human miRNA primers</i> |                         |
|----------------------------|-------------------------|
| miR-155                    | TTAATGCTAATCGTGATAGGGGT |
| miR-146a                   | TGAGAACTGAATTCCATGGGTT  |

| <i>Human mRNA primers</i> | <i>forward</i>            | <i>reverse</i>           |
|---------------------------|---------------------------|--------------------------|
| IL-6                      | AGACAGCCACTCACCTCTTCAG    | TTCTGCCAGTGCCTCTTTGCTG   |
| IL-8                      | AAGAGAGCTCTGTCTGGACC      | GATATTCTCTTGCCCTTGG      |
| MMP2                      | AGCGAGTGGATGCCGCCTTTAA    | CATTCCAGGCATCTGCGATGAG   |
| MMP9                      | CTGAGTCAGCACTTGCTGTCA     | TATGCTTACCCCAGAACCTCCAAT |
| TNF $\alpha$              | CTCTTCTGCCTGCTGCACTTG     | ATGGGCTACAGGCTTGCTACTC   |
| VCAM1                     | CTTTTGGAGTCGAAGATGAGGAAA  | CACTACTATCGCAAACTGACTGAA |
| CCL2                      | CCACTTATCACTCATGGAAGATCCC | GAGTAACTGCGCTGAGTGTGTT   |
| NF- $\kappa$ B (p65)      | AGGCAAGGAATAATGCTGTCCTG   | ATCATTCTCTAGTGTCTGGTTGG  |

| <i>WB antibodies</i>                | <i>Producer</i>          | <i>Cat. #</i> | <i>RRID</i> | <i>Dilution</i> |
|-------------------------------------|--------------------------|---------------|-------------|-----------------|
| MHC class I                         | Santa Cruz Biotechnology | sc-25619      | AB_649123   | 1:1000          |
| NF- $\kappa$ B (p65)                | Abcam                    | ab31481       | AB_2300947  | 1:1000          |
| NF- $\kappa$ B (p65) (phospho-S536) | Abcam                    | ab131109      | AB_11160495 | 1:1000          |
| IFN- $\gamma$                       | Santa Cruz Biotechnology | sc-52556      | AB_629704   | 1:1000          |
| IL-10                               | Santa Cruz Biotechnology | sc-8438       | AB_627793   | 1:1000          |
| Vinculin                            | Merck                    | V9131         | AB_477629   | 1:1000          |
| TGF $\beta$                         | Santa Cruz Biotechnology | sc-374659     | AB_10988781 | 1:500           |
| Arg1                                | Santa Cruz Biotechnology | sc-20150      | AB_2058955  | 1:1000          |
| iNOS                                | Cell Signaling           | 20609         |             | 1:1000          |

| <i>Flow cytometry antibodies</i> | <i>Producer</i>          | <i>Cat. #</i> | <i>RRID</i> | <i>Dilution</i> |
|----------------------------------|--------------------------|---------------|-------------|-----------------|
| CD14 PE                          | Miltenyi Biotec          | 130-110-519   | AB_2655051  | 1:50            |
| CD68 FITC                        | Miltenyi Biotec          | 130-096-964   | AB_2659042  | 1:20            |
| CD64 PE                          | Thermo Fisher Scientific | 12-0649-42    | AB_10667885 | 1:20            |
| CD11B PE                         | Merck                    | FCMAB178P     | AB_10806342 | 1:50            |
| Iba1                             | Thermo Fisher Scientific | PA5-27436     | AB_2544912  | 1:50            |
| CD16 FITC                        | Miltenyi Biotec          | 130-113-954   | AB_2726427  | 1:20            |
| TMEM119                          | Atlas Antibodies         | AMAb91528     | AB_2797214  | 1:20            |

| <i>Secondary antibodies</i> | <i>Producer</i> | <i>Cat. #</i> | <i>RRID</i> | <i>Dilution</i> |
|-----------------------------|-----------------|---------------|-------------|-----------------|
| Anti-rabbit FITC            | Abcam           | ab6717        | AB_955238   | 1:1000          |
| Anti-mouse PE               | Merck           | P9287         | AB_261243   | 1:1000          |

| <i>Isotype (negative) controls</i> | <i>Producer</i> | <i>Cat. #</i> | <i>RRID</i> | <i>Dilution</i> |
|------------------------------------|-----------------|---------------|-------------|-----------------|
| FITC Mouse IgG1                    | BD Biosciences  | 558905        | AB_397156   | 1:50            |
| PE Mouse IgG1                      | BD Biosciences  | 558904        | AB_397155   | 1:50            |

**Figure S1.** Uncropped WB related to Figure 6b.

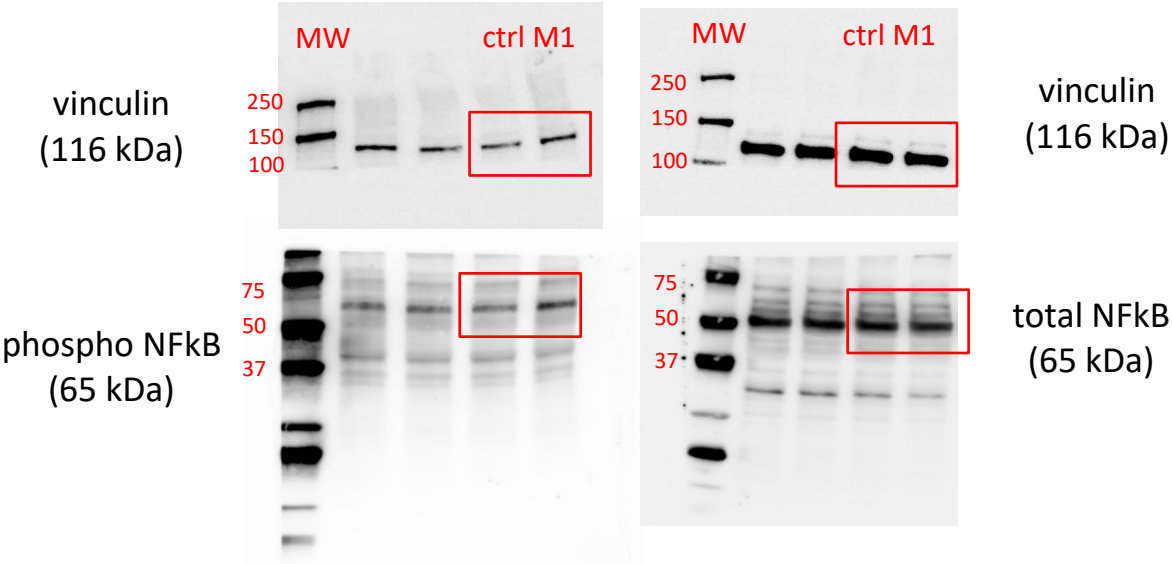

Supplement: s1 [file s1]
